# Supplementary material for: Visualization of Component Status Information of Prefabricated Concrete Building Based on Building Information Modeling and Radio Frequency Identification: A Case Study in China
Source: Hindawi journal article supplement (doi:10.1155/2019/6870507), 2019-01-01
Supplement: f1 [file 6870507.f1.xlsx]

## Sheet: Sheet1
The list of Acronyms and Abbreviations in this study
Number	Abbreviations	Full name
1	BIM	Building Information Modeling
2	RFID	Radio Frequency Identification
3	IFC	Industry Foundation Class
4	PC	Personal Computer
5	API	Application Programming Interface
6	CAD	Management Software Computer Aided Design
7	GIS	Geographic Information System
8	IP	Internet Protocol
9	DB	Data Base
10	EPC	Electronic Product Code
11	MEP	Mechanical, Electrical & Plumbing
